# Supplementary material for: Niga-ichigoside F1 ameliorates high-fat diet-induced hepatic steatosis in male mice by Nrf2 activation
Source: Royal Society of Chemistry journal article supplement (doi:10.1039/c7fo01051f), 2017-12-21

### Supplementary information

**Supplementary Fig.1** Purity analysis of niga-ichigoside F1 by RP-HPLC. Purity of niga-ichigoside F1 was determined by RP-HPLC (Shimadzu LC-20AT) equipped with an SPD-20A spectrophotometer using Inert Sustain (5 $\mu$ m 4.6 $\times$ 150mm) column. The isolated niga-ichigoside F1 ( $t_R$  17.112 min) was eluted with MeOH/H<sub>2</sub>O gradient (10-100% in 20 min), which suggested its purity more than 95% in 210 nm.

**Supplementary Fig.2** Cell viability and lipid accumulation in HepG2 cells. Effects of FFA on cellular viability (as % of control) of HepG2 cells as measured by MTT assay (A) and LDH leakage assay (B). Effects of FFA on lipid accumulation in HepG2 cells (C). Effects of NI on cellular viability (as % of control) of 1 mM FFA treated HepG2 cells as measured by MTT assay (D) and LDH leakage assay (E). Incubations were performed for 24 h with different concentrations of FFA or NI or the combination. All data were from three to five independent experiments performed in duplicate and results were represented as mean  $\pm$  SEM.  $\star p < 0.05$  vs. control group;  $\blacklozenge p < 0.05$  between different concentrations of FFA-treated groups;  $\bullet p < 0.05$  vs. 1mM FFA-treated group.

Supplementary Fig.1

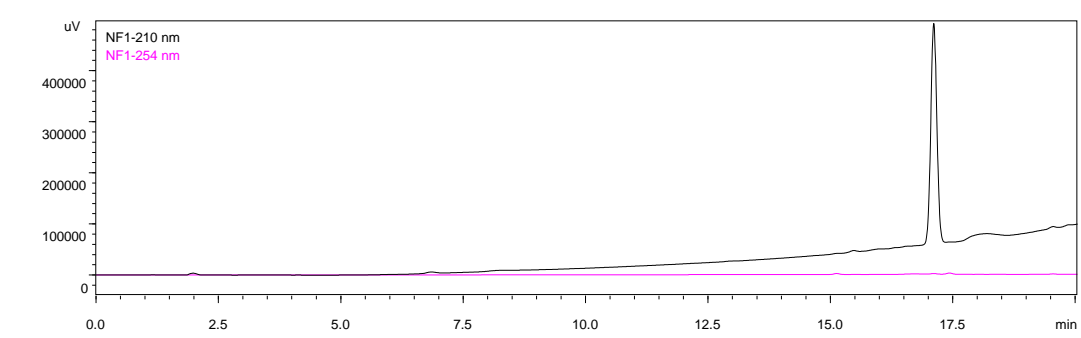

Supplementary Fig.2

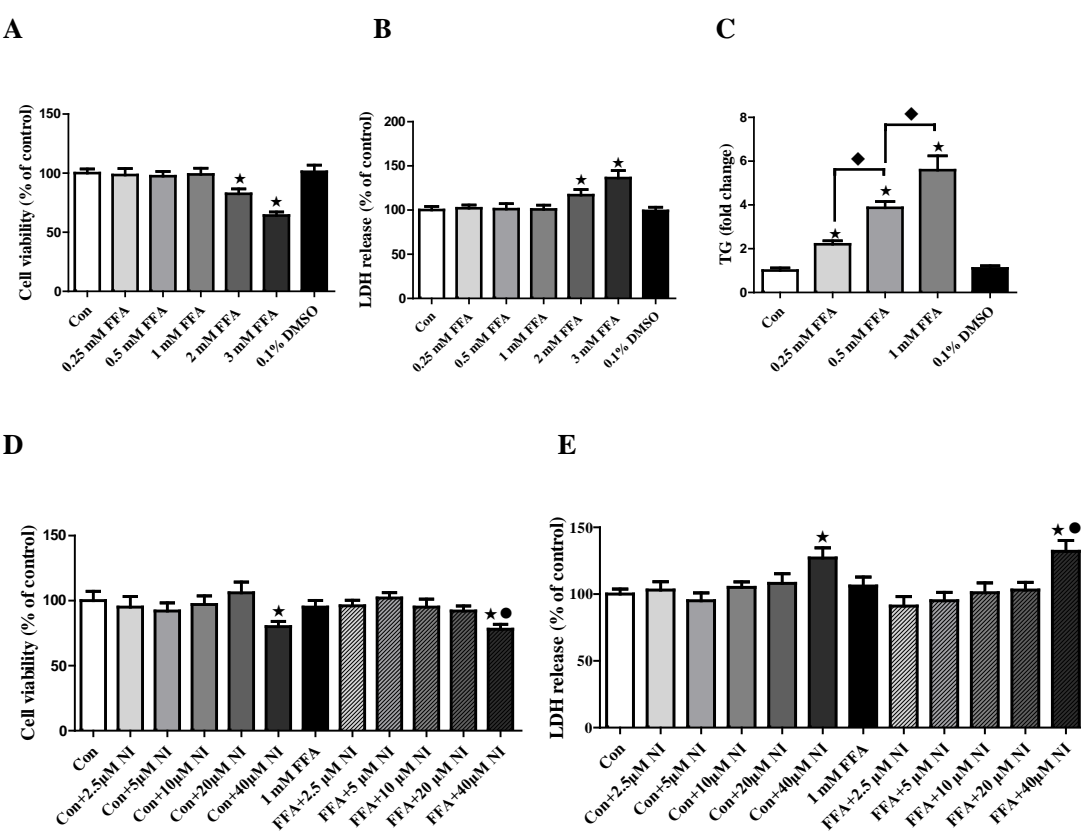

Supplement: c7fo01051f1.pdf [file c7fo01051f1.pdf]
